# Supplementary material for: A Dietary Intervention with Reduction of Starch and Sucrose Leads to Reduced Gastrointestinal and Extra-Intestinal Symptoms in IBS Patients
Source: MDPI journal article supplement (doi:10.3390/nu11071662), 2019-07-20
Supplement: s1 [file s1]

# Supplementary Materials:

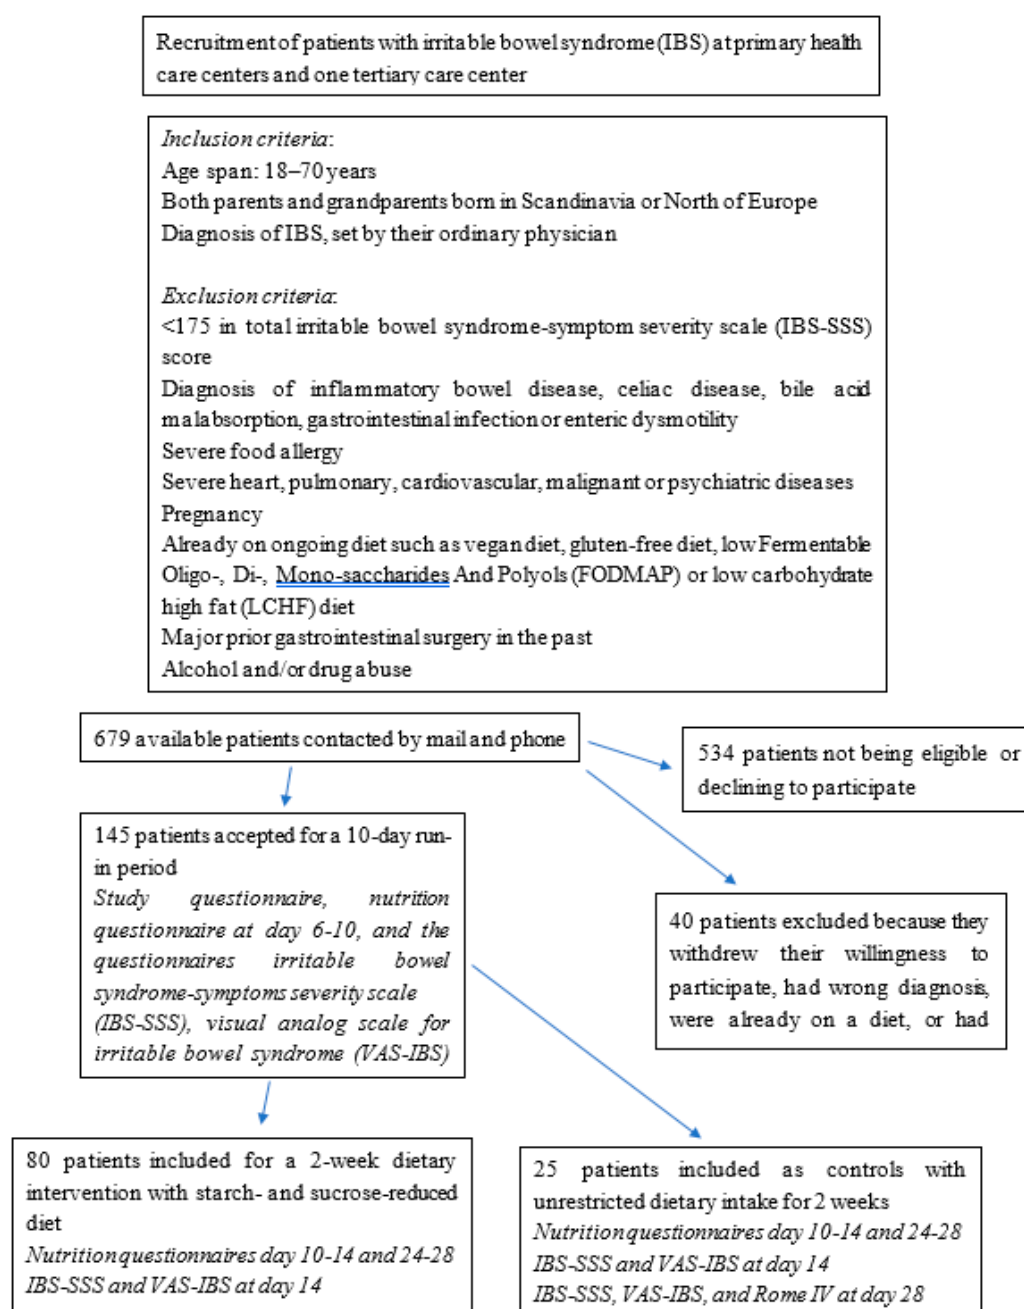

**Figure S1:** Flow chart over inclusion and exclusion criteria.

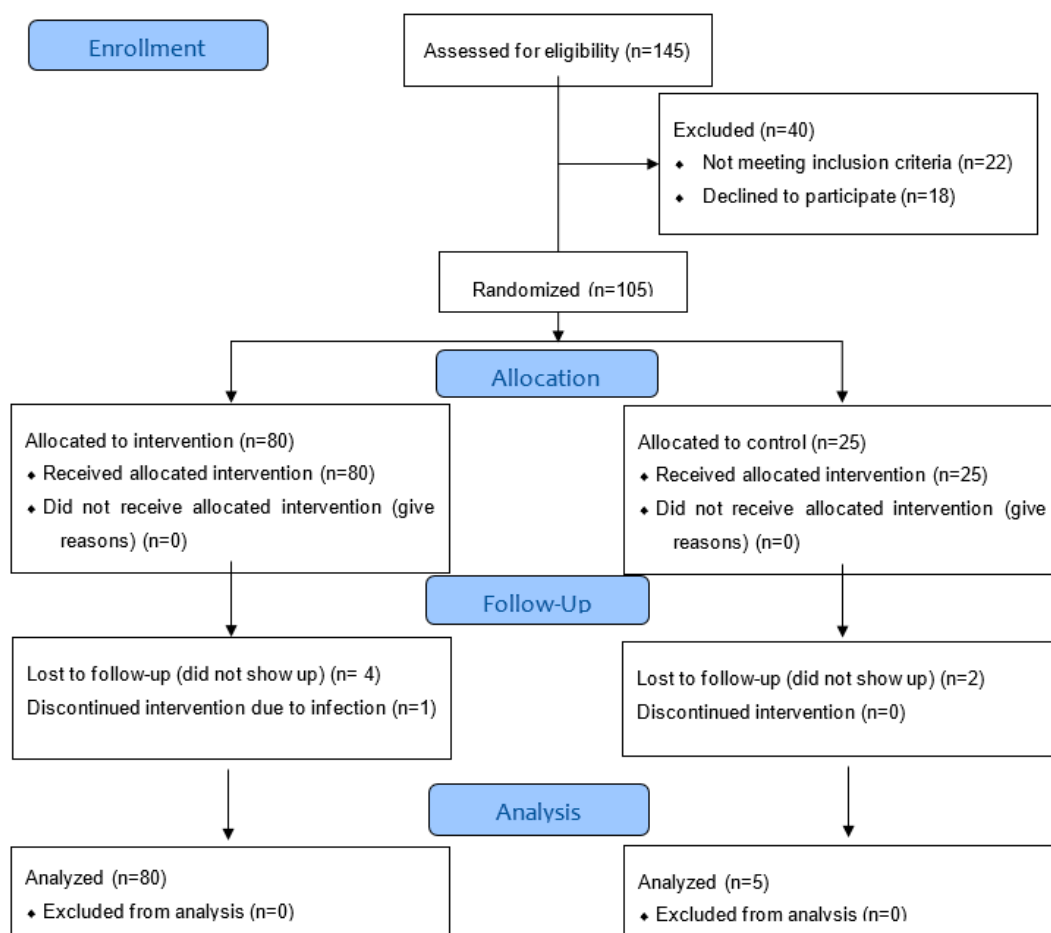

**Figure S2.** CONSORT 2010 Flow Diagram.

**Table S1.** Reasons for not being eligible for/declining study participation.

| Reasons for Non-Inclusion                   | Number |
|---------------------------------------------|--------|
| Did not answer when calling                 | 188    |
| Did not want to participate                 | 157    |
| Wrong address                               | 62     |
| Already on a diet in the exclusion criteria | 45     |
| No or mild symptoms                         | 37     |
| Another diagnosis                           | 27     |
| Moved from the region                       | 14     |
| Pregnancy                                   | 4      |

**Table S2.** Recommendations of fruit intake according to a starch- and sucrose- reduced diet.

| Well Tolerated | Tolerated by Some | Not Tolerated  |
|----------------|-------------------|----------------|
| Avocado        | Persimmons        | Apples         |
| Blackberries   | Plums             | Apricots       |
| Blueberries    | Raisins           | Bananas        |
| Boysenberries  | Watermelon        | Cantaloupe     |
| Cherries       |                   | Dates          |
| Cranberries    |                   | Grapefruits    |
| Currants       |                   | Guava          |
| Figs           |                   | Honeydew melon |
| Gooseberries   |                   | Mangos         |
| Grapes         |                   | Nectarines     |
| Kiwi fruits    |                   | Oranges        |

|              |                |
|--------------|----------------|
| Lemons       | Passion fruits |
| Limes        | Peaches        |
| Loganberries | Pineapples     |
| Olives       | Tangelos       |
| Papayas      | Tangerines     |
| Pears        |                |
| Pomegranates |                |
| Prunes       |                |
| Raspberries  |                |
| Rhubarbs     |                |
| Strawberries |                |

Information from Ref No 9.

**Table S3.** Recommendations of vegetable and legume intake according to a starch- and sucrose-reduced diet.

| <b>Well Tolerated</b> | <b>Tolerated by Some</b> | <b>Not Tolerated</b> |
|-----------------------|--------------------------|----------------------|
| Alfafa sprouts        | Edamame soybeans         | Beets                |
| Artichokes *          | Jicamas                  | Black beans          |
| Arugulas              | Leeks                    | Black-eyed peas      |
| Asparagus *           | Okra                     | Butternut            |
| Bamboo shoots         | Pumpkins                 | Carrots              |
| Bok choy              | Snow peas                | Cassavas             |
| Broccoli *            | Tempeh                   | Chickpeas            |
| Brussels sprouts *    | Tofu                     | Corn                 |
| Cabbages *            | Yellow wax beans         | Garlic               |
| Cauliflower *         |                          | Green peas           |
| Celery                |                          | Lentils              |
| Chard                 |                          | Kidney beans         |
| Chicories             |                          | Lima beans           |
| Chives                |                          | Navy beans           |
| Collard greens        |                          | Onion                |
| Cress                 |                          | Parsnips             |
| Cucumbers             |                          | Pinto beans          |
| Eggplants             |                          | Potatoes             |
| Endive                |                          | Soybeans             |
| Green beans           |                          | Split peas           |
| Kale                  |                          | Sweet potatoes       |
| Lettuces              |                          | Yams                 |
| Mung bean sprout      |                          |                      |
| Mushrooms             |                          |                      |
| Mustard green         |                          |                      |
| Peppers               |                          |                      |
| Radishes              |                          |                      |
| Spaghetti squash      |                          |                      |
| Spinach               |                          |                      |
| Tomatoes              |                          |                      |
| Turnips               |                          |                      |
| Yellow squash         |                          |                      |
| Zucchini              |                          |                      |

Information from Ref No 9. \* = These food items can evoke GI symptoms in all subjects.

**Table S4.** Concomitant diseases besides irritable bowel syndrome (IBS) and drugs used as regular treatments.

| <b>Diseases</b> |    |
|-----------------|----|
| Allergy         | 17 |
| Hypothyreosis   | 12 |

|                         |    |
|-------------------------|----|
| Asthma bronchialis      | 11 |
| Depression              | 11 |
| Hypertension            | 10 |
| Migraine                | 7  |
| Lactose intolerance     | 5  |
| Pain in back and joints | 5  |
| <b>Drug Treatment</b>   |    |
| Antidepressants         | 21 |
| Laxatives               | 14 |
| Proton pump inhibitor   | 13 |
| Levaxine                | 13 |
| Hormonal treatment      | 11 |
| Vitamin D               | 11 |
| Statins                 | 8  |
| Folic acid              | 6  |
| Cobalamin               | 5  |
| Asthma inhalators       | 5  |

---
